# Supplementary material for: Diverse Effect of Two Cytokinins, Kinetin and Benzyladenine, on Plant Development, Biotic Stress Tolerance, and Gene Expression
Source: MDPI journal article supplement (doi:10.3390/life11121404), 2021-12-15
Supplement: s1 [file s1]

Supplementary Table S2

| Array ID <sup>a</sup> | Arabidopsis TAIR code <sup>b</sup> | Gene name <sup>c</sup> | Forward primer                          | Reverse primer                          | BA microarray <sup>d</sup> | BA RT-PCR <sup>e</sup> | Kin microarray <sup>f</sup> | Kin RT-PCR <sup>g</sup> |
|-----------------------|------------------------------------|------------------------|-----------------------------------------|-----------------------------------------|----------------------------|------------------------|-----------------------------|-------------------------|
| A_84_P13657           | AT3G29590                          | At5MAT                 | 5' CGG TTT GTG TGC GTT GGT T 3'         | 5' TGG TTC TGC TTT CAC GTC GAA 3'       | -1.81 <sup>h</sup>         | -1.83                  | 1.98                        | 1.57                    |
| A_84_P808177          | AT5G59320                          | LTP3                   | 5' TAA AAC CAC ACC AGA CCG CC 3'        | 5' AGA CCA GAA ATG CTC TTC GCA 3'       | -4.32                      | -5.93                  | 1.68                        | 1.23                    |
| A_84_P14446           | AT2G19190                          | FRK1                   | 5' AAC GAG AAG CTC CAA GCG AA 3'        | 5' GGG GTC AAG GTA ACC GAT GG 3'        | 3.60                       | 2.41                   | -1.09                       | -1.71                   |
| A_84_P814710          | AT1G14870                          | PCR2                   | 5' CCA AGC CTC ATG CTG AAG GA 3'        | 5' TAC AAT CTC GGC GAC TTG GC 3'        | 1.91                       | 1.43                   | -1.33                       | -1.03                   |
| A_84_P10728           | AT2G29110                          | GLR2.8                 | 5' CCA AAG GGT TAC GCC ATA GAC 3'       | 5' CTG CAT CCA AAG TCC CGT TAT 3'       | 1.37                       | 0.32                   | -1.68                       | -1.22                   |
| A_84_P16678           | AT4G25420                          | GA200X1                | 5' CGG TGG TGA ACA GCG AGA GC 3'        | 5' CTC GGT GGC GTC ACT ACT CTG 3'       | 2.60                       | 2.51                   | 2.71                        | 1.94                    |
| A_84_P167173          | AT4G25480                          | DREB1A                 | 5' ACA GAG GAG TTC GTC GGA GAA 3'       | 5' CGG CAA CGT CGT GAG C 3'             | 1.60                       | 1.16                   | 2.02                        | 1.14                    |
| A_84_P21915           | AT1G20190                          | EXPA11                 | 5' GCA ATC CGC CGC TTA AAC AT 3'        | 5' CGG GAA CGA TTC CTC CTC TG 3'        | 2.11                       | 2.55                   | 1.82                        | 1.71                    |
| A_84_P10627           | AT2G20880                          | ERF053                 | 5' CGA GCA CGG CAT TGG CAG T 3'         | 5' CCA TAG AGG GCT TCC AGG TCC 3'       | -2.98                      | -3.90                  | -3.28                       | -4.07                   |
| A_84_P19231           | AT2G26150                          | HSFA2                  | 5' TGA GGC AAC AGC AAC ACA GC 3'        | 5' GGC AAG GAA CGT CAT CAT CTG 3'       | -2.33                      | -3.18                  | -3.17                       | -2.69                   |
| A_84_P146199          | AT5G05440                          | PYL5                   | 5' GTC CCT GAA CAC GTT GCG ATG 3'       | 5' CAC AAG AGC CCA CAC GGA CTC 3'       | -1.85                      | -2.02                  | -2.80                       | -2.54                   |
| A_84_P156615          | AT4G12490                          | AZI3                   | 5' ACC CTA CGC CAG TCA TTC CTC 3'       | 5' CCG CTT AGC ACA TTC GCA CAT 3'       | 6.71                       | 10.92                  |                             |                         |
| A_84_P14074           | AT5G56970                          | CKX3                   | 5' GCT GCG TGG CTA TGG ATT GA 3'        | 5' ATC TGT GGA CCG TAC CGA AAC 3'       | 5.48                       | 8.95                   |                             |                         |
| A_84_P17268           | AT2G14610                          | PR1                    | 5' GTA GGC GTA GGT CCC ATG CAG 3'       | 5' CCA GAC AAG TCA CCG CTA CCC 3'       | 5.53                       | 6.93                   |                             |                         |
| A_84_P610481          | AT2G34600                          | JAZ7                   | 5' TTG GAA CTT CGC CTT CTT ACT TCT T 3' | 5' CTG AGA TTC TTG CTT TGG TTG TGA 3'   | -5.53                      | -5.00                  |                             |                         |
| A_84_P544827          | AT3G25760                          | AOC1                   | 5' TCA TCT AAC GGT CCA GGT TCC TC 3'    | 5' CTT CTT GGG CGT GAA ACT TGT C 3'     | -3.98                      | -3.65                  |                             |                         |
| A_84_P15340           | AT2G06050                          | OPR3                   | 5' ACG TTA CAC AAC CTC GCT ACC AC 3'    | 5' CAT CAC TCC CTT GCC TTC CA 3'        | -3.69                      | -3.37                  |                             |                         |
| A_84_P11715           | AT3G04290                          | LTL1                   | 5' GGG CTT TCT TTG TCT TTG GTG 3'       | 5' GGG CAG TGG TGA CGA GGT A 3'         |                            |                        | 2.88                        | 1.89                    |
| A_84_P14899           | AT5G10930                          | CIPK5                  | 5' CGG AAG CGA GGA GGT TGA TT 3'        | 5' GCT AAC GGC GGA GTG AAG TTT 3'       |                            |                        | 2.05                        | 1.57                    |
| A_84_P21605           | AT5G46830                          | NIG1                   | 5' GAT CCG TCG CCA CCA TTA CT 3'        | 5' CAG CAT GTA AAC GCT TCG GG 3'        |                            |                        | 1.65                        | 1.58                    |
| A_84_P12477           | AT1G79680                          | WAKL10                 | 5' CGG CAG GCA AGT GTG TCA A 3'         | 5' CCA CCA ATG AAT ACC AAT GTG CT 3'    |                            |                        | -2.68                       | -2.03                   |
| A_84_P555790          | AT5G48657                          |                        | 5' TTC CTC CCA CAC CAG AAA CA 3'        | 5' TAC TTT GCC CTC TAA GAT TGC GTA T 3' |                            |                        | -2.20                       | -1.37                   |

|              |           |      |                                   |                                  |  |  |       |       |
|--------------|-----------|------|-----------------------------------|----------------------------------|--|--|-------|-------|
| A_84_P174151 | AT2G40330 | PYL6 | 5' TCA GTT TCA GCG TCG TTG GTG 3' | 5' CTT CTT GCC GTC GGA GTC CT 3' |  |  | -1.98 | -0.74 |
|--------------|-----------|------|-----------------------------------|----------------------------------|--|--|-------|-------|

<sup>a</sup> Array probe identifiers of Agilent Arabidopsis 4x44k V4 microarray

<sup>b</sup> Arabidopsis TAIR gene identifiers ([www.arabidopsis.org](http://www.arabidopsis.org))

<sup>c</sup> common abbreviations of *Arabidopsis* gene names

<sup>d</sup> Gene expression results obtained by Agilent Arabidopsis 4x44k V4 microarray. Benzyladenine (BA) induced transcription levels were compared to water treated controls.

<sup>e</sup> Gene expression results obtained by quantitative RT-PCR. Benzyl adenine (BA) induced transcription levels were normalized to constitutive expressed ubiquitin conjugating enzyme (AT1G14400) and compared to water treated controls.

<sup>f</sup> Gene expression results obtained by Agilent Arabidopsis 4x44k V4 microarray. Kinetin (Kin) induced transcription levels were compared to water treated controls.

<sup>g</sup> Gene expression results obtained by quantitative RT-PCR. Kinetin (Kin) induced transcription levels were normalized to constitutive expressed ubiquitin conjugating enzyme (AT1G14400) and compared to water treated controls.

<sup>h</sup> gene expression in log<sub>2</sub> transformed form. Values are averages of three independent biological replicates. In the case of empty cells the gene expression results did not shown significant changes in microarray experiments.
