# Supplementary material for: Diverse Effect of Two Cytokinins, Kinetin and Benzyladenine, on Plant Development, Biotic Stress Tolerance, and Gene Expression
Source: MDPI journal article supplement (doi:10.3390/life11121404), 2021-12-15

**Figure S1.** Benzyladenine (BA) repressed several consecutive steps of JA synthesis. Red and green colors represent up- or down-regulated genes, respectively. The figures were derived from MAPMAN software (Usadel et al. 2005).

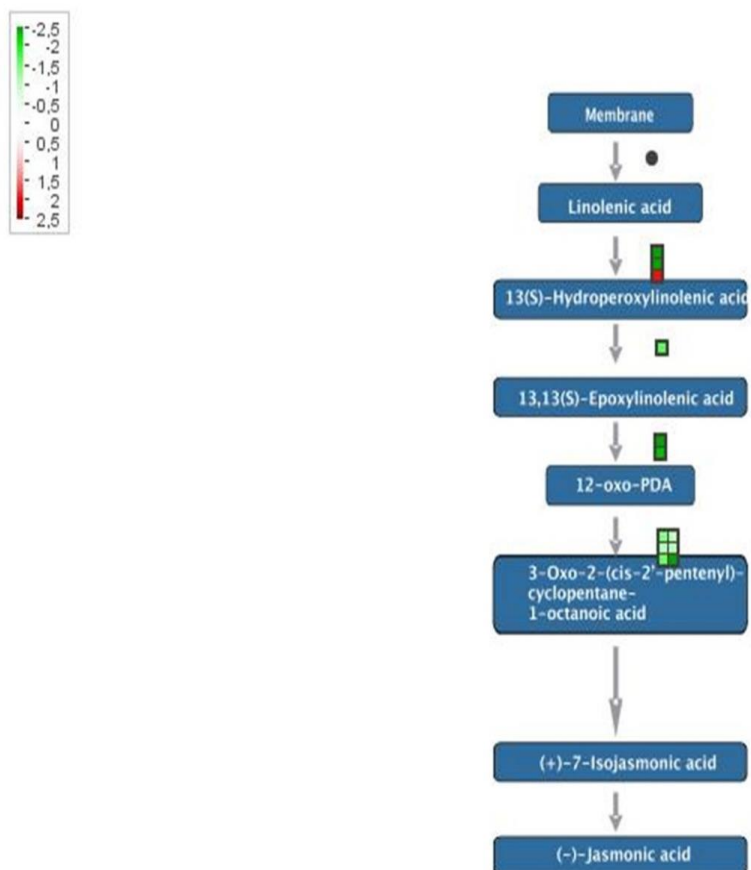

**Figure S2.** Effect of kinetin (**A**) and benzyladenine (**B**) on gene expressions related to secondary metabolism. Red and green colors represent up- or down-regulated genes, respectively. The figures were derived from MAPMAN software (Usadel et al. 2005).

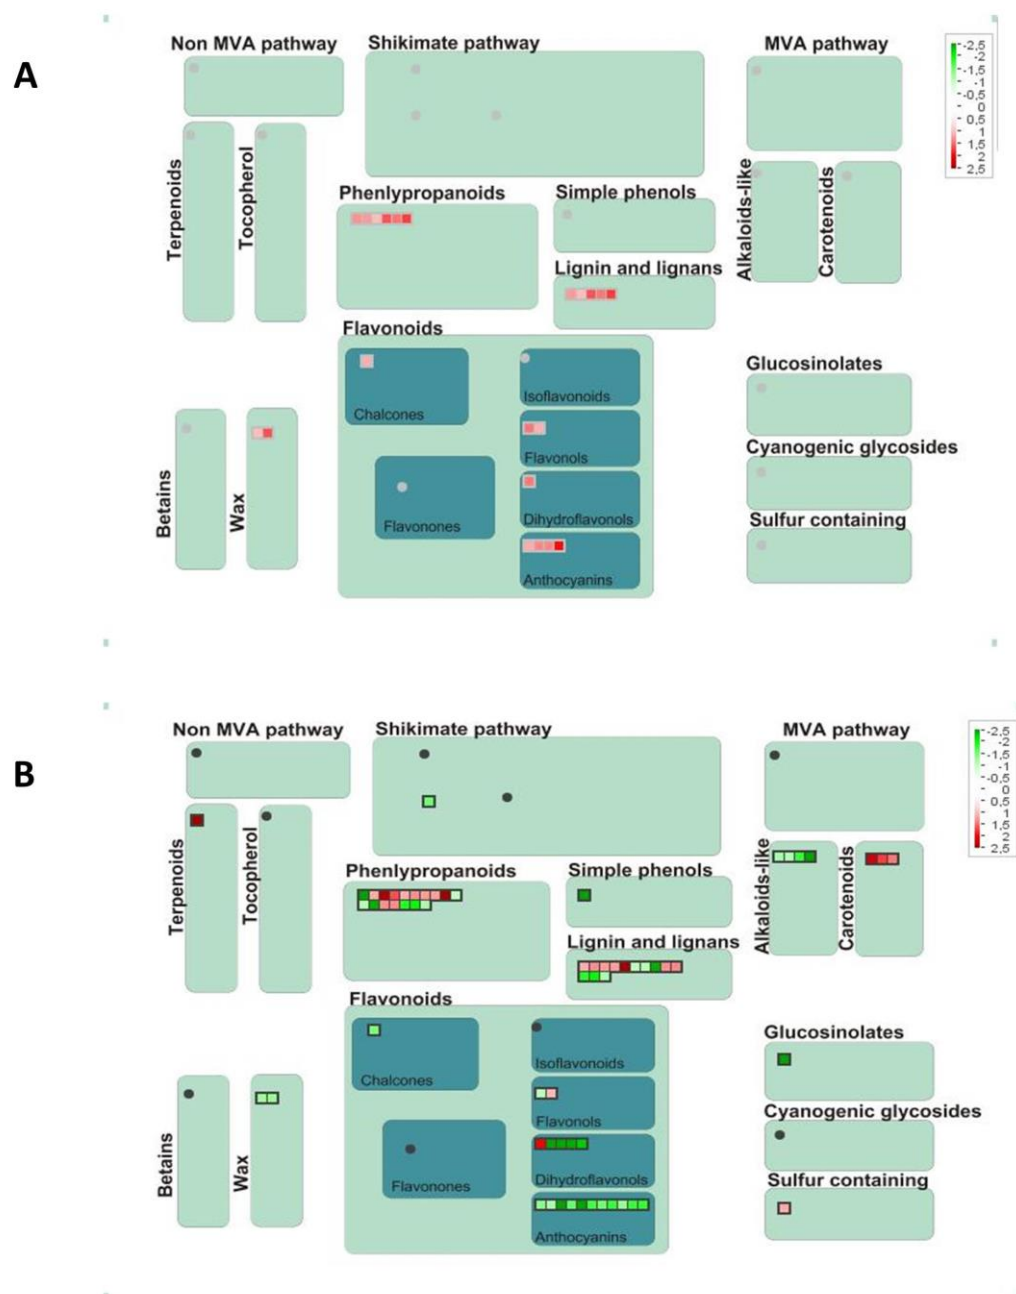

**A**

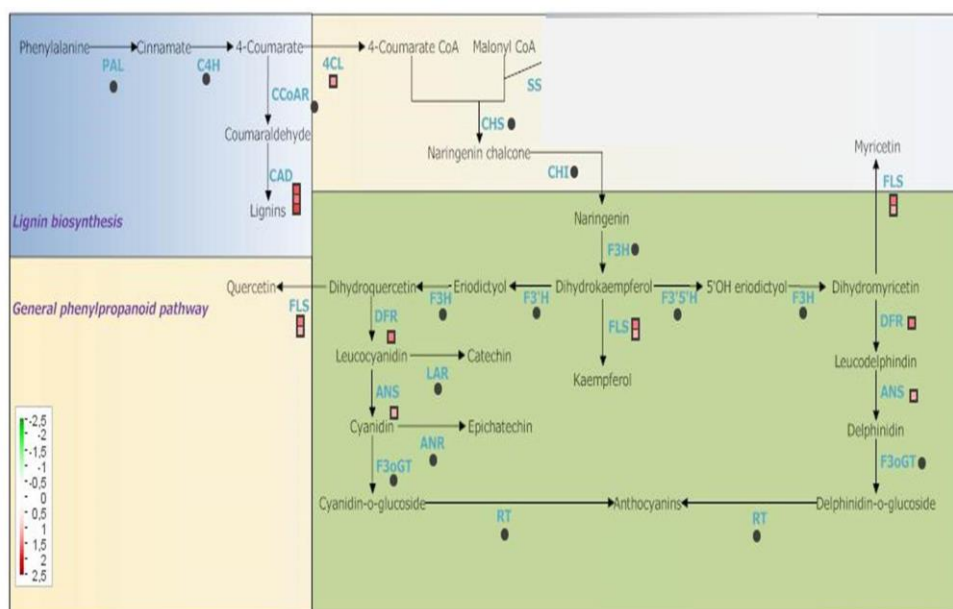

**B**

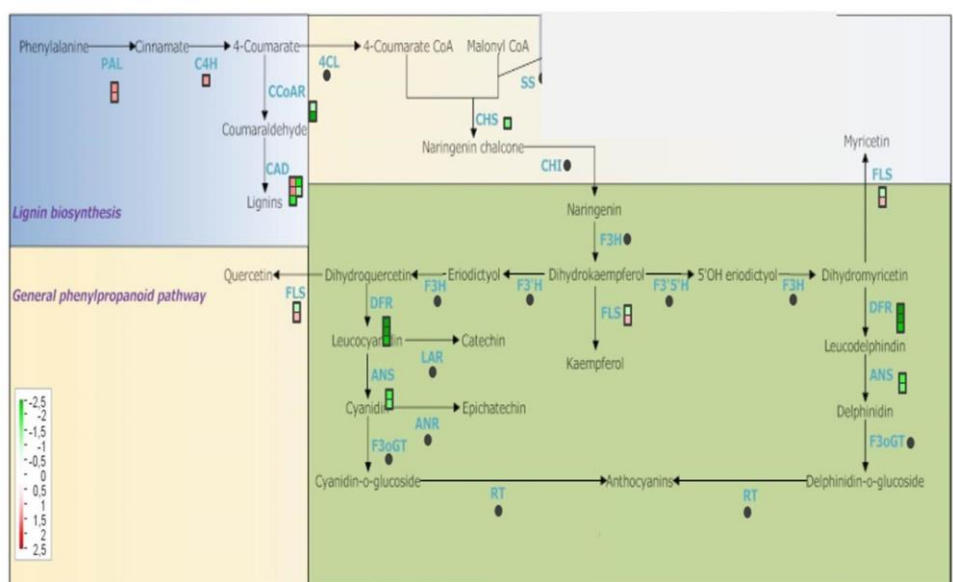

Supplement: s1 [file s1]
